# Supplementary material for: Differential induction of muscle atrophy pathways in two mouse models of spinal muscular atrophy
Source: PubMed Central journal article supplement (PMC4924104; doi:10.1038/srep28846), 2016-06-28
Supplement: srep28846-s1.pdf [file srep28846-s1.pdf]

# **Differential induction of muscle atrophy pathways in two mouse models of spinal muscular atrophy**

Marc-Olivier Deguise<sup>1,2,3</sup>, Justin G. Boyer<sup>1,2,4</sup>, Emily McFall<sup>1</sup>, Armin Yazdani<sup>1,2</sup>, Yves De Repentigny<sup>1</sup> and Rashmi Kothary<sup>1,2,3,5,\*</sup>

<sup>1</sup>Regenerative Medicine Program, Ottawa Hospital Research Institute, Ottawa, Ontario, Canada K1H 8L6

<sup>2</sup>Department of Cellular and Molecular Medicine, University of Ottawa, Ottawa, Ontario, Canada K1H 8M5

<sup>3</sup>Centre for Neuromuscular Disease, University of Ottawa, Ottawa, Ontario, Canada K1H 8M5

<sup>4</sup>Present address: Cincinnati Children's Hospital Medical Center, Cincinnati, OH 45229, USA

<sup>5</sup>Department of Medicine, University of Ottawa, Ottawa, Ontario, Canada K1H 8M5

\*Correspondence to: Rashmi Kothary; Ottawa Hospital Research Institute; 501 Smyth Road, Ottawa, Ontario, Canada K1H 8L6; Tel: (613) 737-8707; Fax: (613) 737-8803; Email: rkothary@ohri.ca

Supplementary Table S1: List of primers used in this study and their respective annealing temperatures.

| <b>Gene target</b> | <b>Forward primer</b>    | <b>Reverse primer</b>    | <b>Ta</b> |
|--------------------|--------------------------|--------------------------|-----------|
| <b>Atrogin-1</b>   | CGTCTCACTTTCCCCTCAAG     | GACTCCCAGCCATCCAATTAG    | 57        |
| <b>MuRF1</b>       | AGTGTCCATGTCTGGAGGTCGTTT | ACTGGAGCACTCCTGCTTGTAGAT | 60        |
| <b>GabarapL1</b>   | CATCGTGGAGAAGGCTCCTA     | ATACAGCTGGCCCATGGTAG     | 62        |
| <b>Bnip3</b>       | TTCCACTAGCACCTTCTGATGA   | GAACACCGCATTTACAGAACAA   | 60        |
| <b>CathepsinL</b>  | GTGGACTGTTCTCACGCTCAAG   | TCCGTCCTTCGCTTCATAGG     | 60        |
| <b>FoxO1</b>       | CAAAGTACACATACGGCCAATCC  | CGTAACTTGATTTGCTGTCCTGAA | 60        |
| <b>FoxO3</b>       | CCTCATCTCAAAGCTGGGTAC    | GGTTTTCTCTGTAGGTCTTCCG   | 63        |
| <b>FoxO4</b>       | AAATGCCAGCCTCGGCCAGC     | GGCATTCTCCAGTAACAG       | 60        |
| <b>Gapdh</b>       | TCGGTGTGAACGGATTTG       | GGTCTCGCTCCTGGAAGA       | 62        |

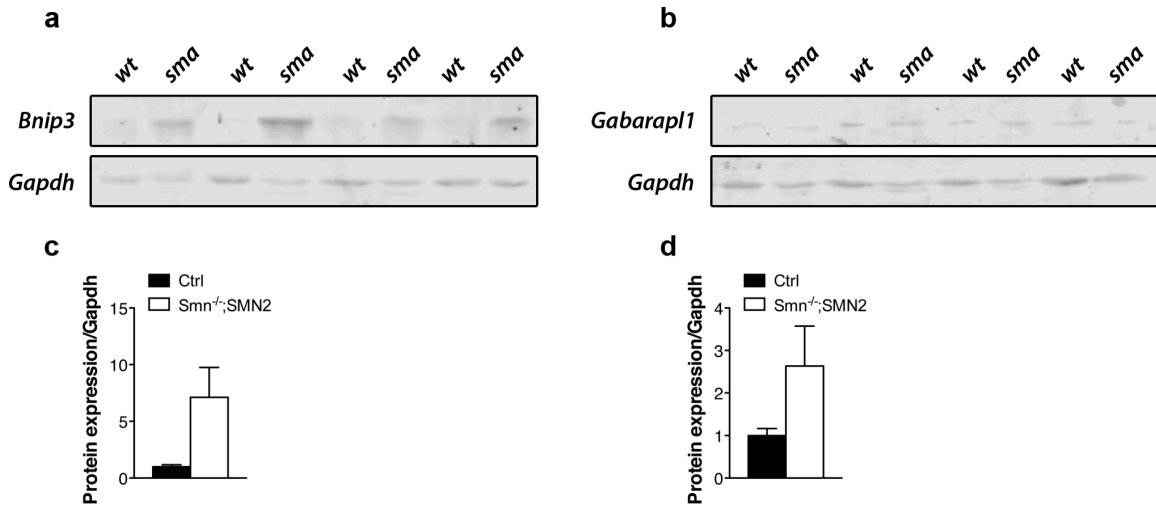

Supplementary Figure S1. *Smn*<sup>-/-</sup>;*SMN2* hearts show a trend toward increased **Bnip3** and **Gabarap11** protein levels at P5. (a) Western blot of Bnip3. (b) Western blot of Gabarap11. (c) Quantification of Bnip3 protein expression showing a trend toward elevated protein levels compared to control. (d) Quantification of Gabarap11 protein expression showing a trend toward elevated protein levels compared to control.

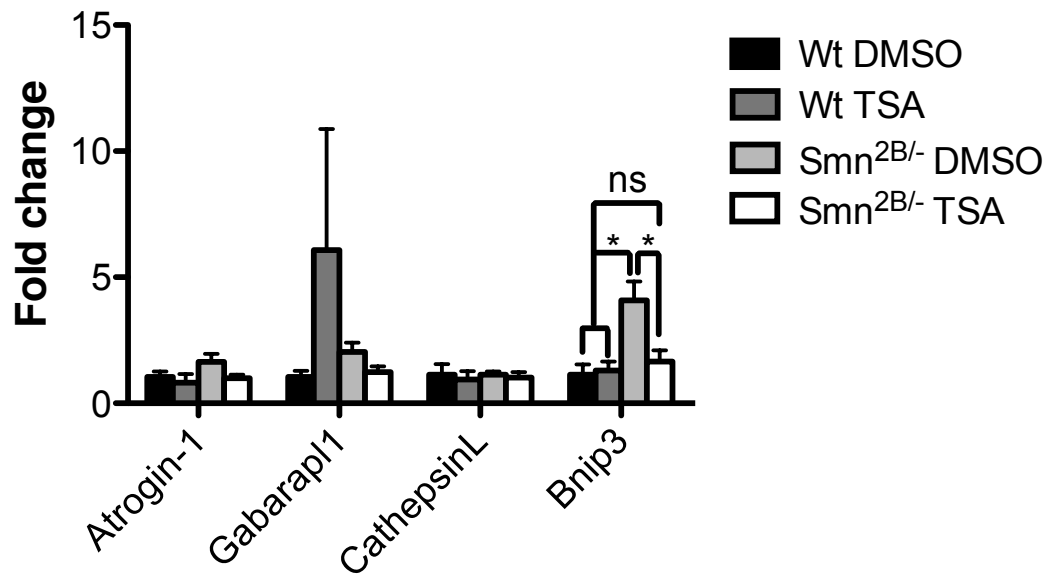

Supplementary Figure S2. **TSA administration to *Smn*<sup>2B/-</sup> mice restores *Bnip3* expression in hearts to normal levels.** Atrogin-1, Gararapl1 and CathepsinL were unchanged as observed above. TSA treatment did not alter their expression. The increased expression of *Bnip3* was effectively brought back to wild type control levels. (N=3 for all experiments;  $p \leq 0.05$  for \*)
